# Supplementary material for: Control of adaptive action selection by secondary motor cortex during flexible visual categorization
Source: eLife journal article supplement (doi:10.7554/elife.54474), 2020-06-24

**Figure 5 - figure supplement 6**

Correlation coefficient between preference for choice in current trial and preference for stimulus in last trial

**A**

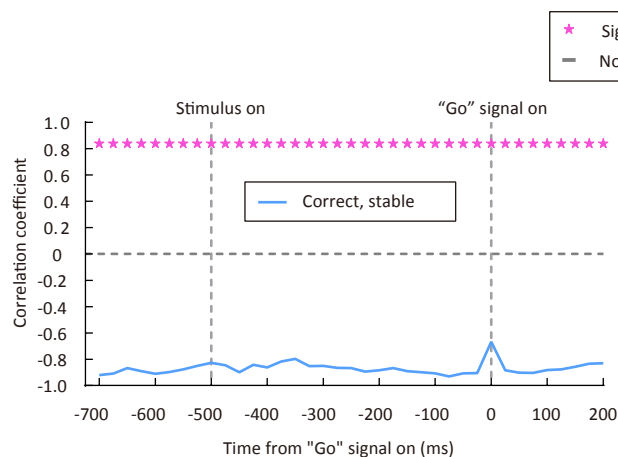

**B**

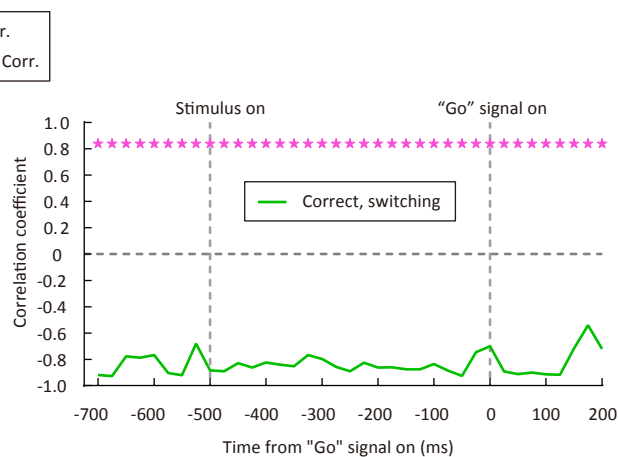

Correlation coefficient between preference for choice in current trial and preference for stimulus in the trial before last

**C**

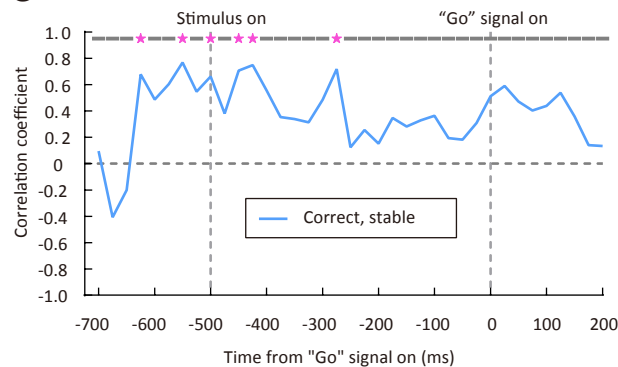

**D**

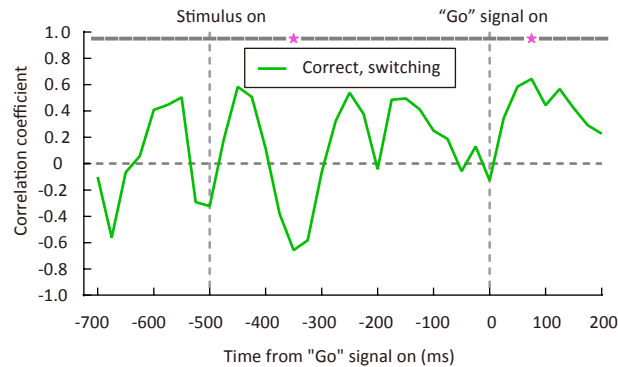

Supplement: supp [file elife_poa_e54474_Figure_5_figure_supplement_6.pdf › elife_poa_e54474_Figure_5_figure_supplement_6.pdf]
