# Supplementary figures and images for: Control of adaptive action selection by secondary motor cortex during flexible visual categorization
Source: eLife journal article supplement (doi:10.7554/elife.54474), 2020-06-24

**Figure3 - figure supplement 1**

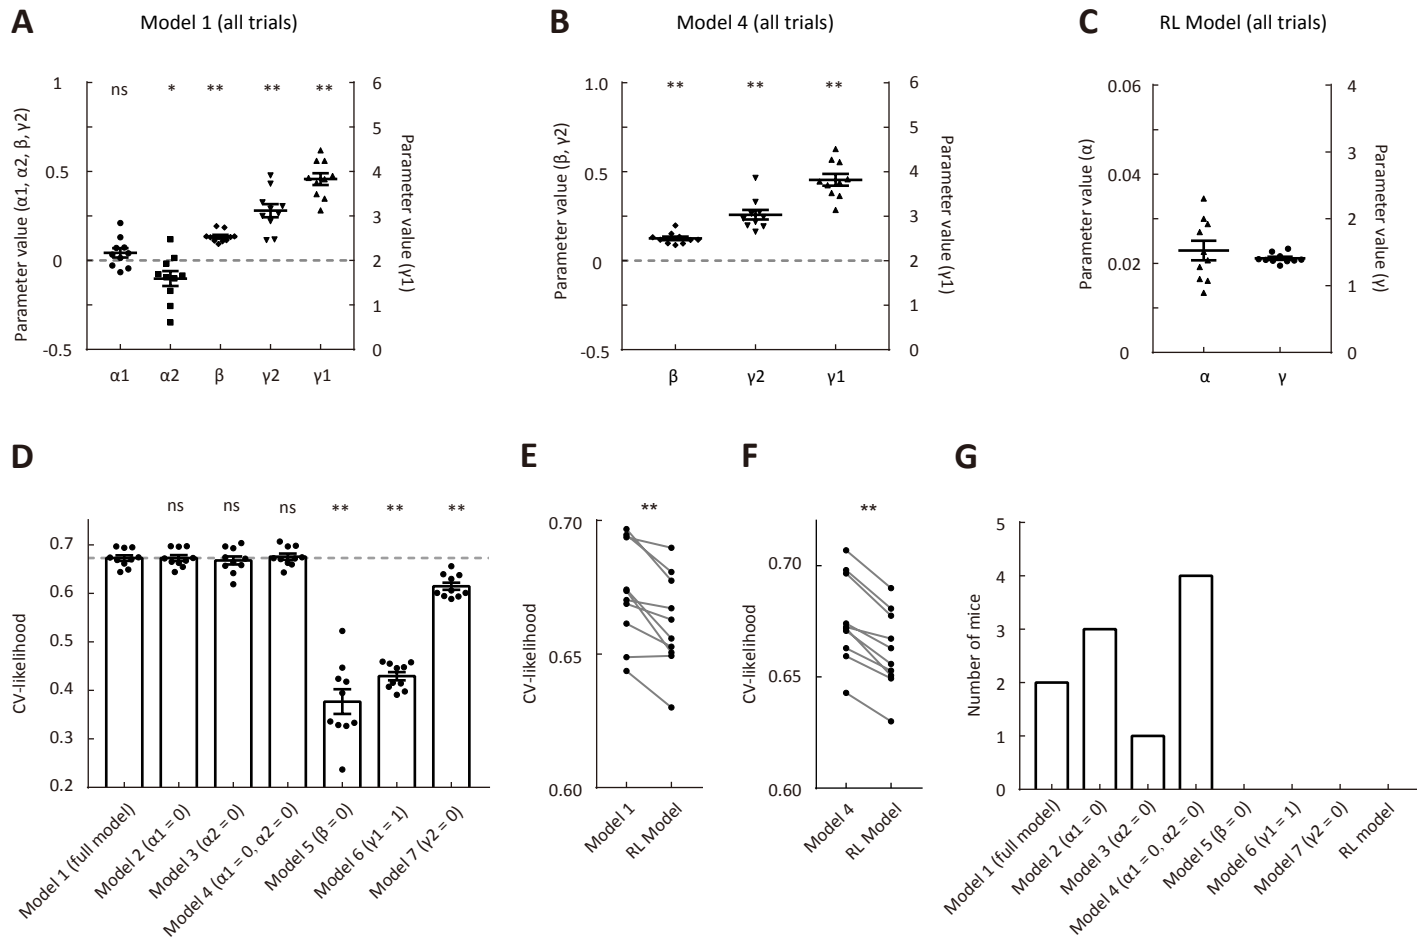

Supplement: supp [file elife_poa_e54474_Figure_3_figure_supplement_1.pdf › elife_poa_e54474_Figure_3_figure_supplement_1.pdf]

Figure 3 - figure supplement 2

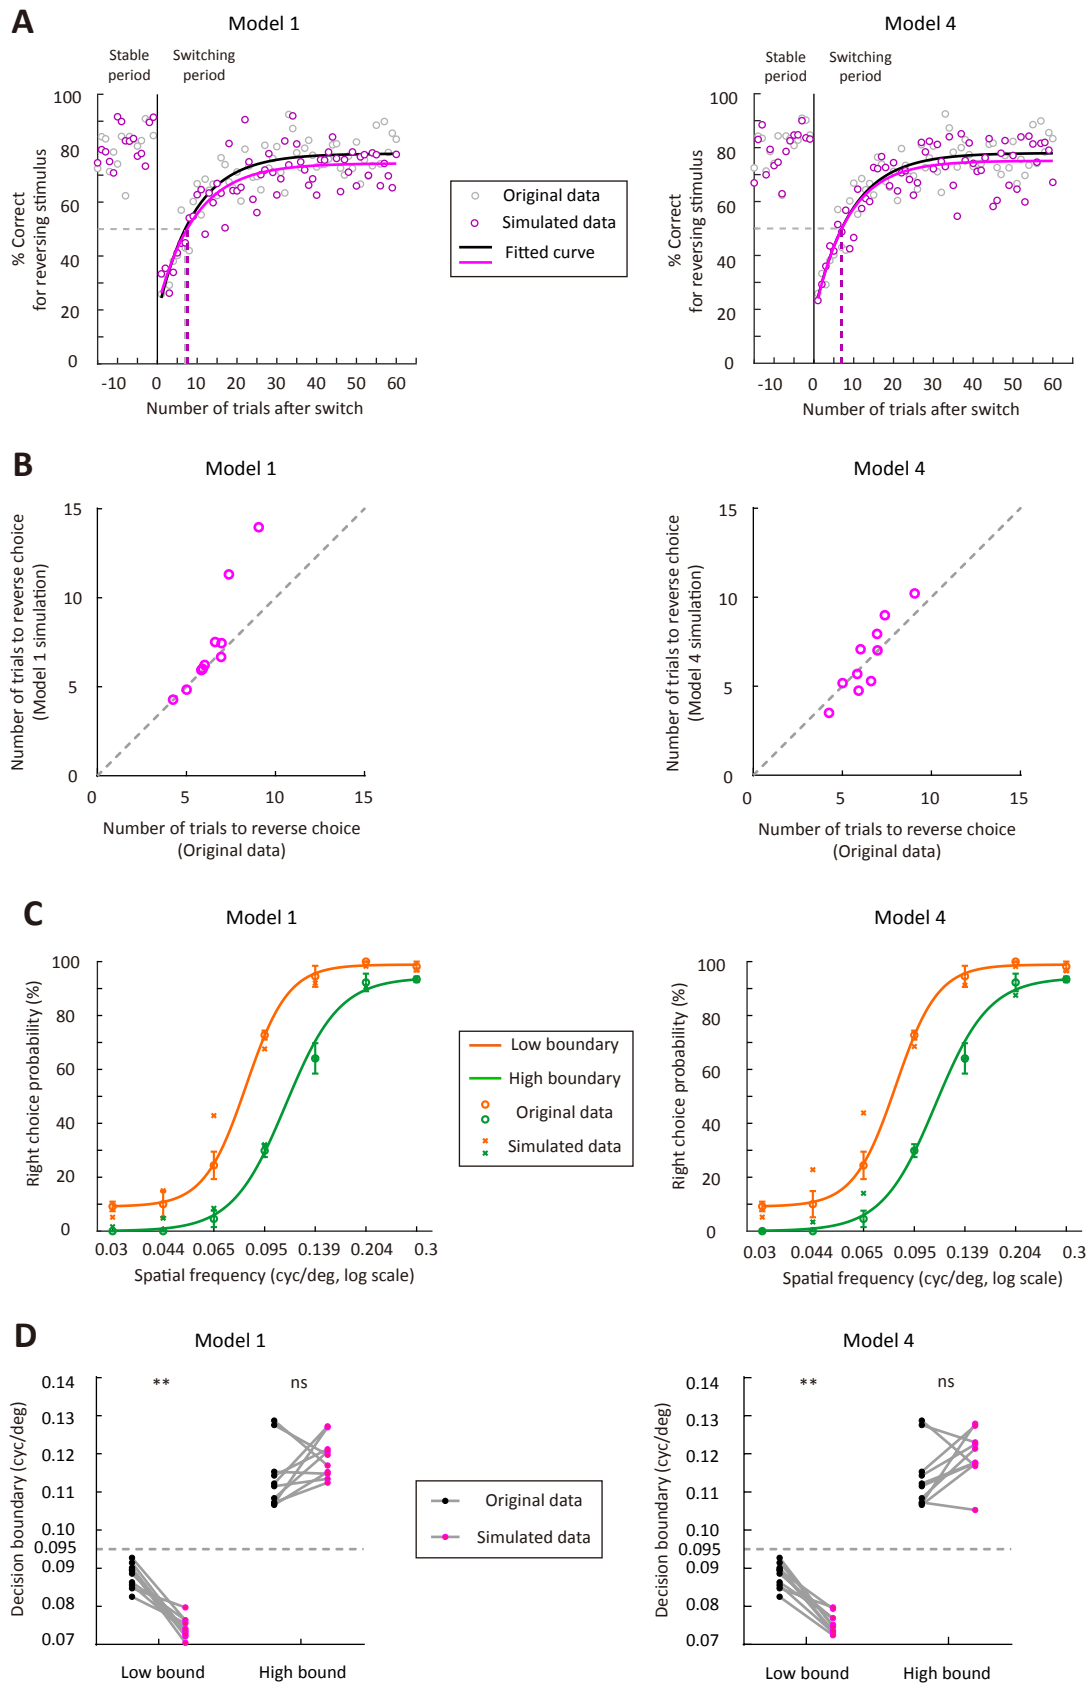

Supplement: supp [file elife_poa_e54474_Figure_3_figure_supplement_2.pdf › elife_poa_e54474_Figure_3_figure_supplement_2.pdf]

**Figure 3 - figure supplement 3**

**A**

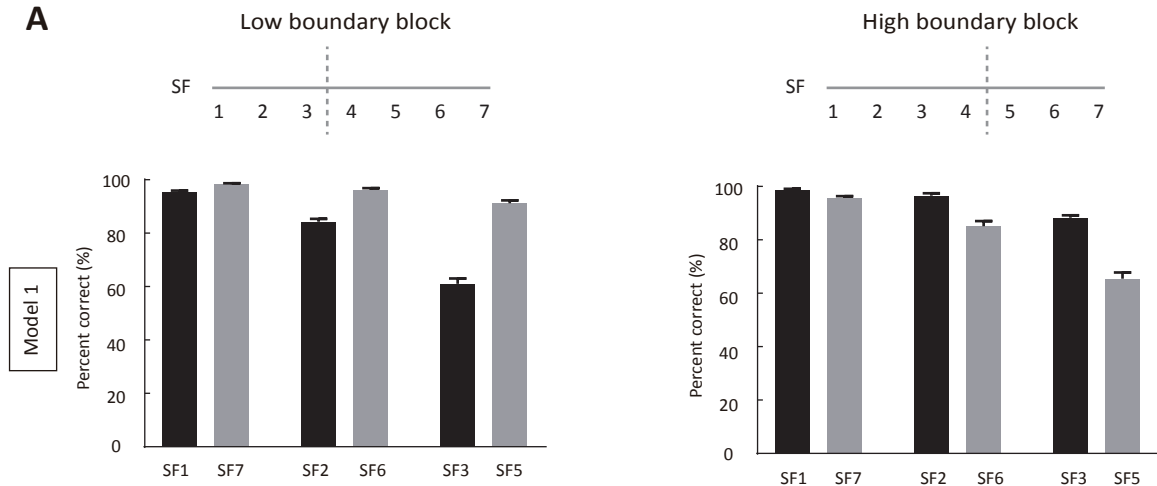

**B**

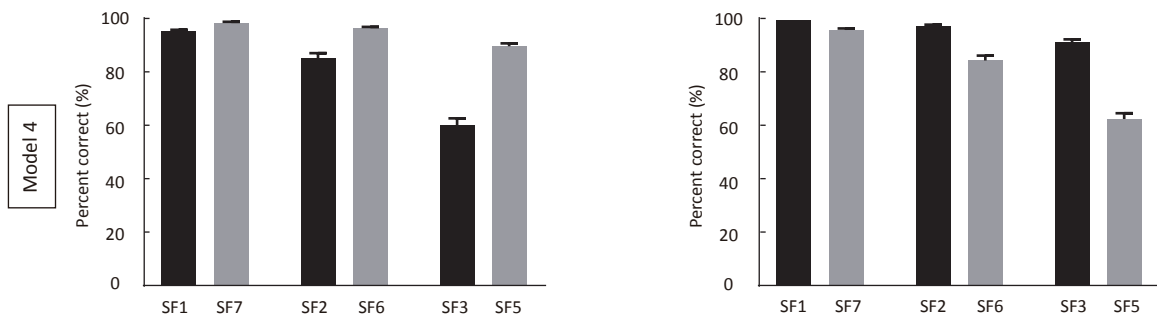

**C**

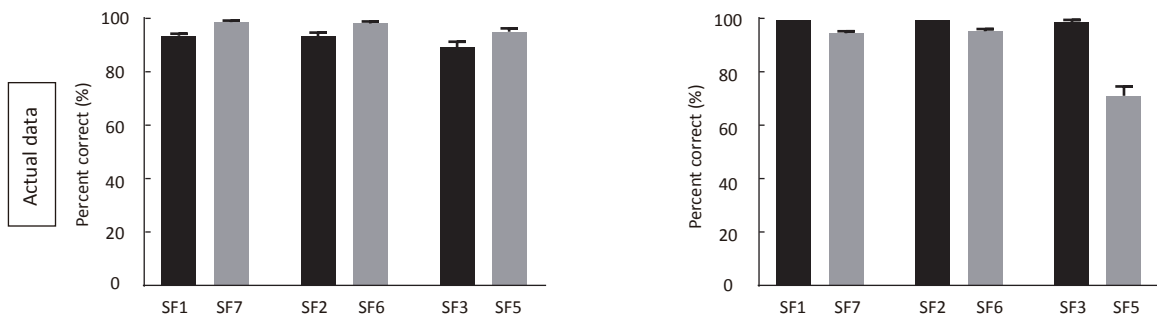

Supplement: supp [file elife_poa_e54474_Figure_3_figure_supplement_3.pdf › elife_poa_e54474_Figure_3_figure_supplement_3.pdf]

**Figure 3 - figure supplement 4**

**A**

Model 1

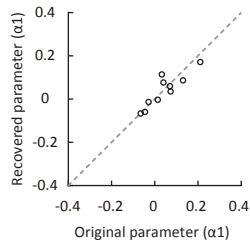

**B**

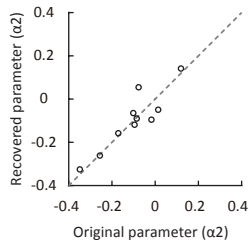

**C**

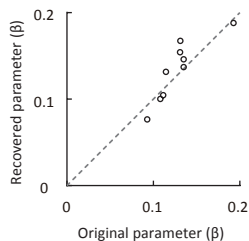

**D**

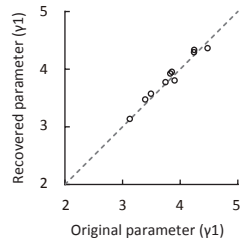

**E**

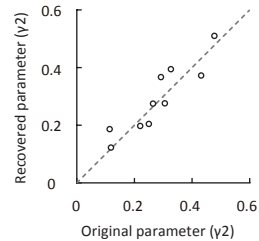

**F**

Model 4

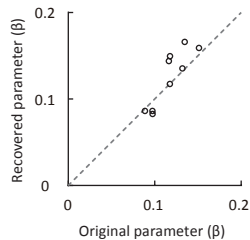

**G**

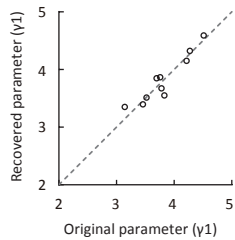

**H**

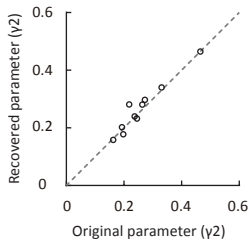

Supplement: supp [file elife_poa_e54474_Figure_3_figure_supplement_4.pdf › elife_poa_e54474_Figure_3_figure_supplement_4.pdf]

**Figure 3 - figure supplement 5**

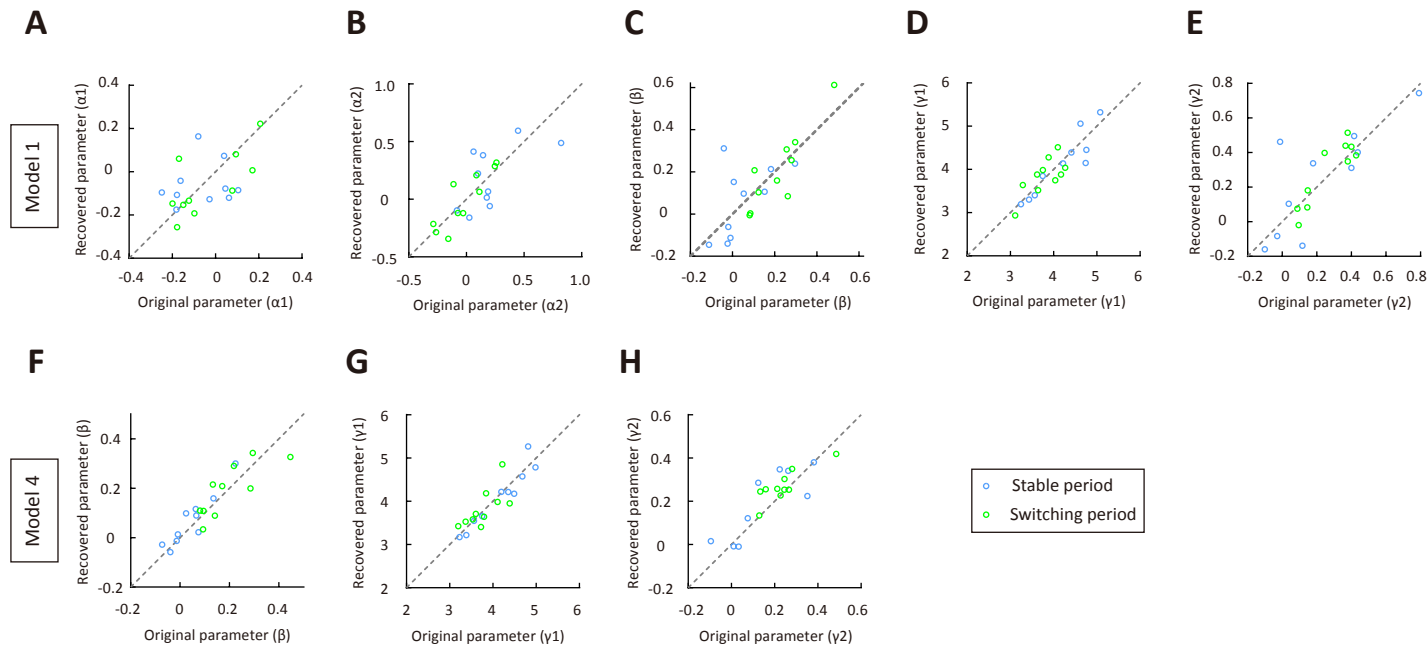

Supplement: supp [file elife_poa_e54474_Figure_3_figure_supplement_5.pdf › elife_poa_e54474_Figure_3_figure_supplement_5.pdf]

**Figure 3 - figure supplement 6**

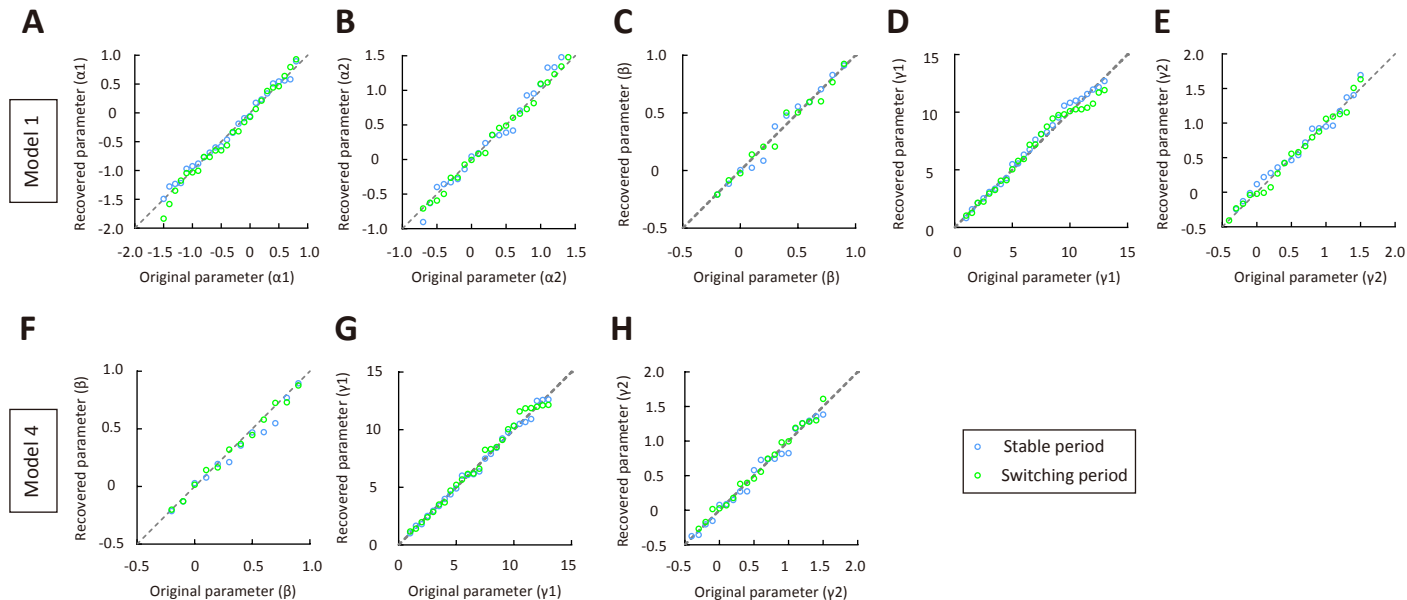

Supplement: supp [file elife_poa_e54474_Figure_3_figure_supplement_6.pdf › elife_poa_e54474_Figure_3_figure_supplement_6.pdf]

# Figure 3 - figure supplement 7

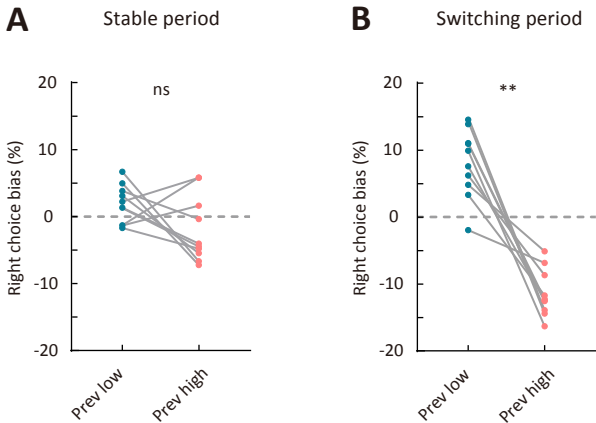

Supplement: supp [file elife_poa_e54474_Figure_3_figure_supplement_7.pdf › elife_poa_e54474_Figure_3_figure_supplement_7.pdf]

**Figure 4 - figure supplement 1**

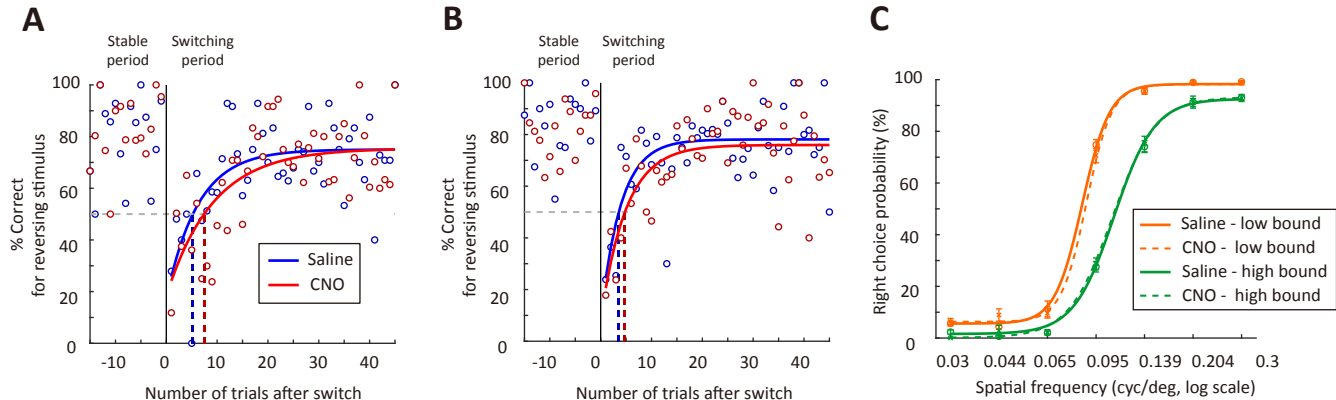

Supplement: supp [file elife_poa_e54474_Figure_4_figure_supplement_1.pdf › elife_poa_e54474_Figure_4_figure_supplement_1.pdf]

**Figure 4 - figure supplement 2**

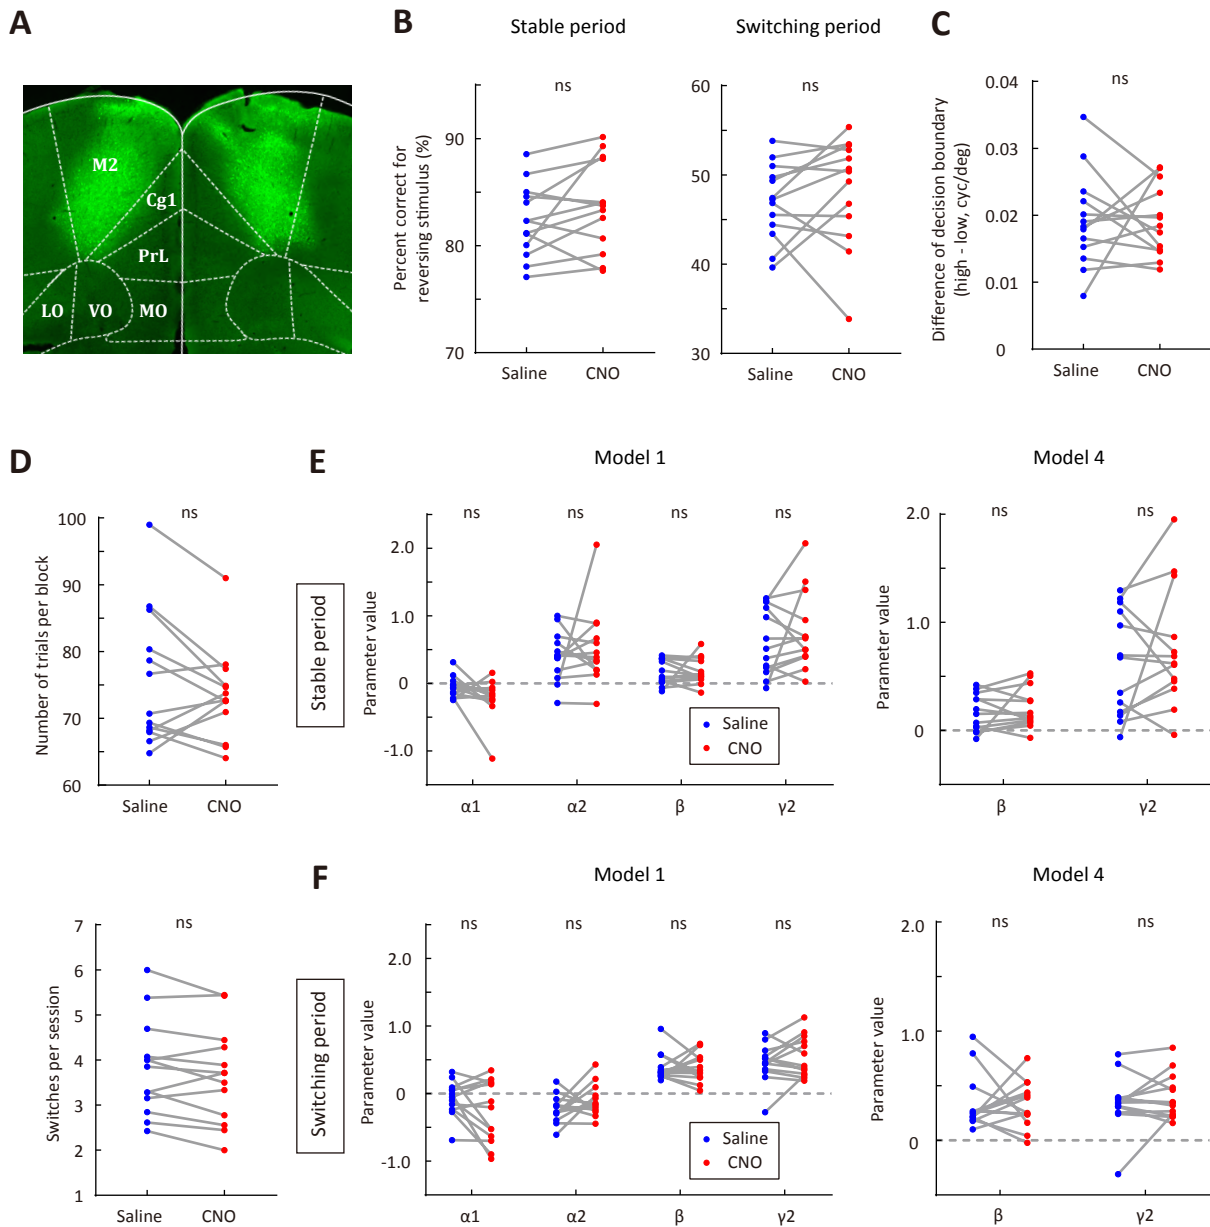

Supplement: supp [file elife_poa_e54474_Figure_4_figure_supplement_2.pdf › elife_poa_e54474_Figure_4_figure_supplement_2.pdf]

**Figure 4 - figure supplement 3**

**A**

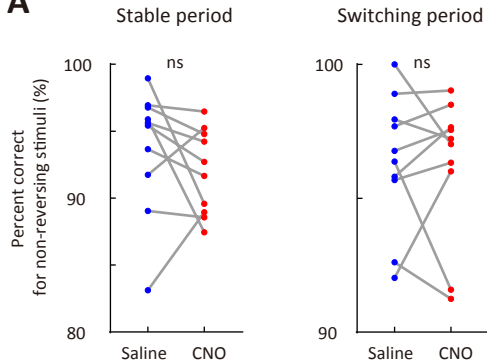

**B**

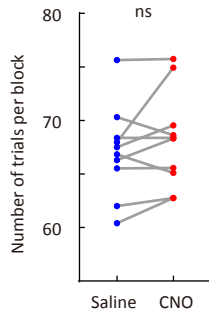

**C**

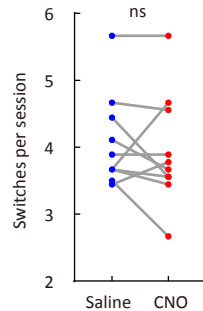

**D**

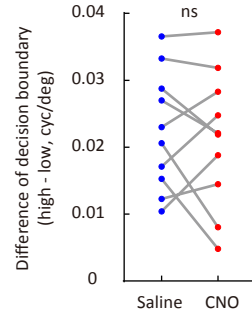

Supplement: supp [file elife_poa_e54474_Figure_4_figure_supplement_3.pdf › elife_poa_e54474_Figure_4_figure_supplement_3.pdf]

## Figure 4 - figure supplement 4

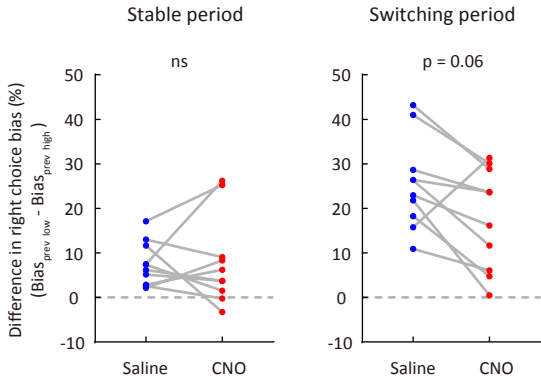

Supplement: supp [file elife_poa_e54474_Figure_4_figure_supplement_4.pdf › elife_poa_e54474_Figure_4_figure_supplement_4.pdf]

**Figure 4 - figure supplement 5**

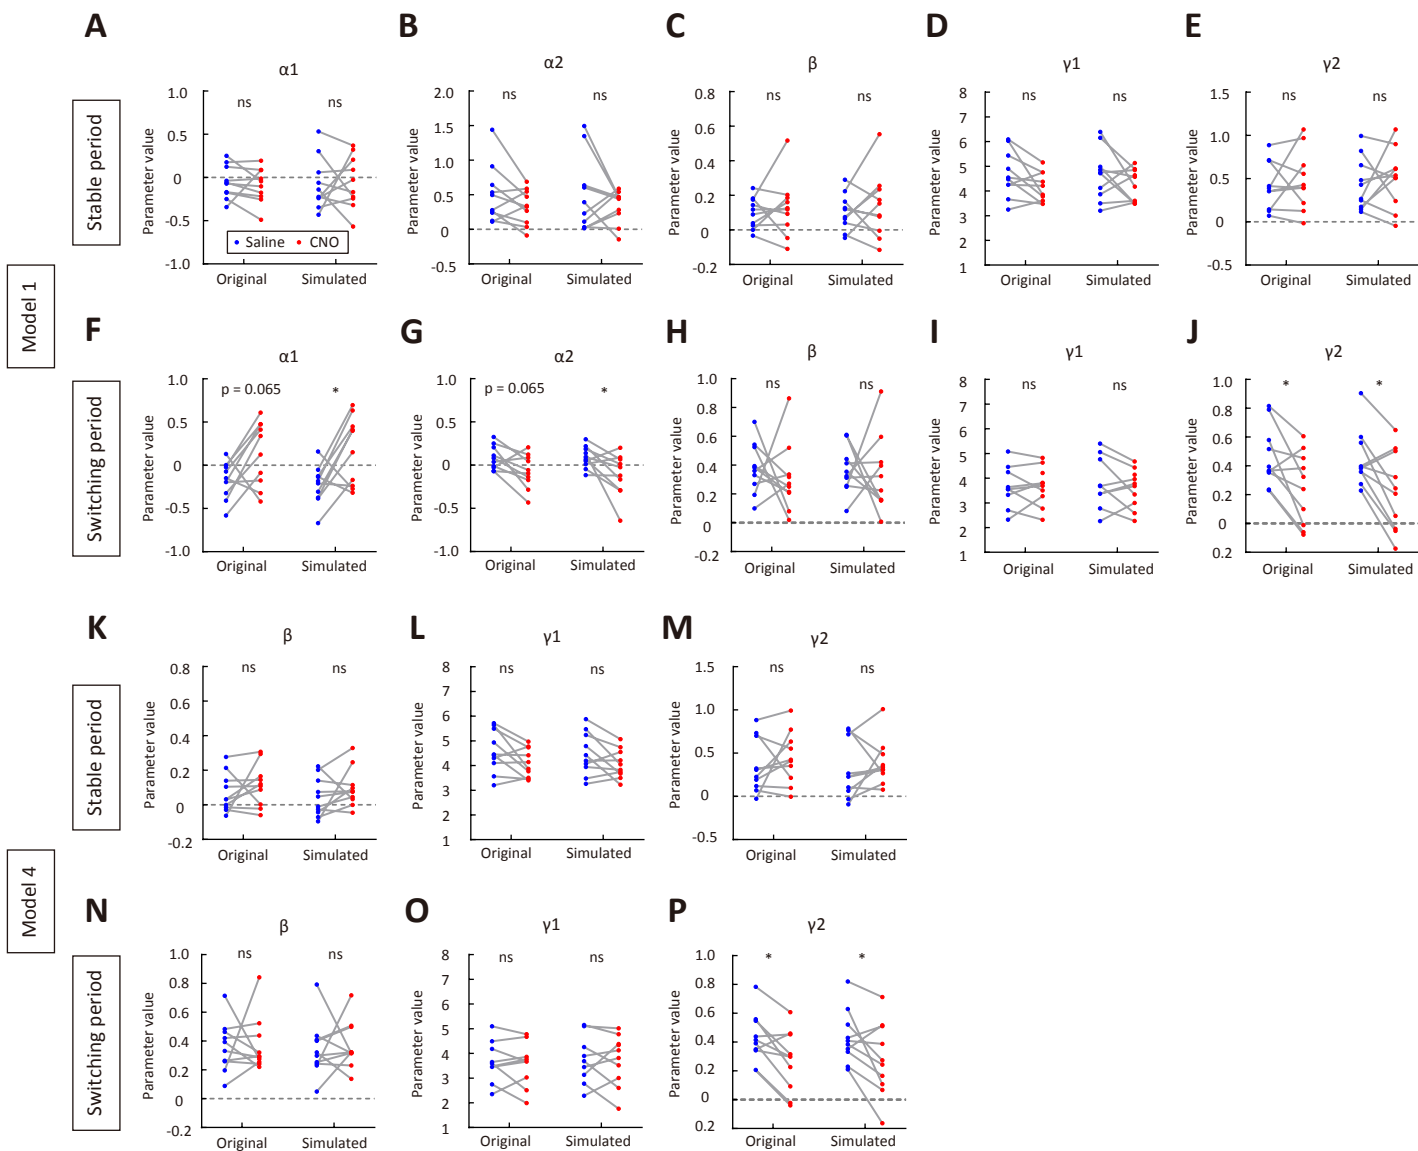

Supplement: supp [file elife_poa_e54474_Figure_4_figure_supplement_5.pdf › elife_poa_e54474_Figure_4_figure_supplement_5.pdf]

**Figure 4 - figure supplement 6**

**A**

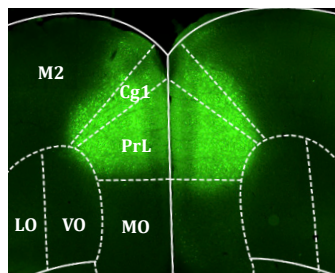

**B**

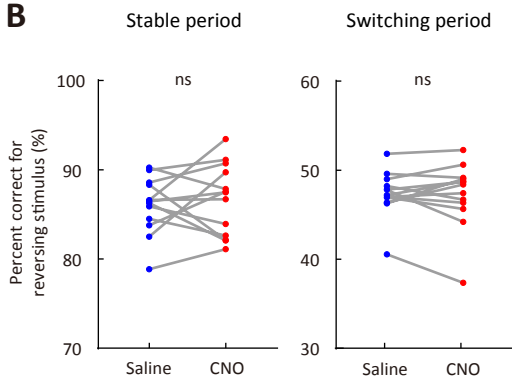

**C**

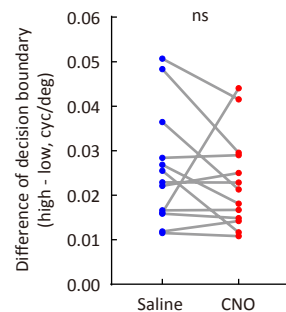

**D**

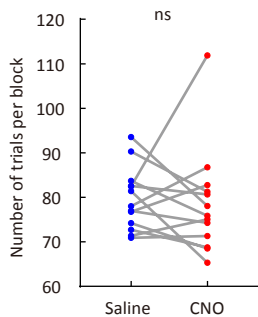

**E**

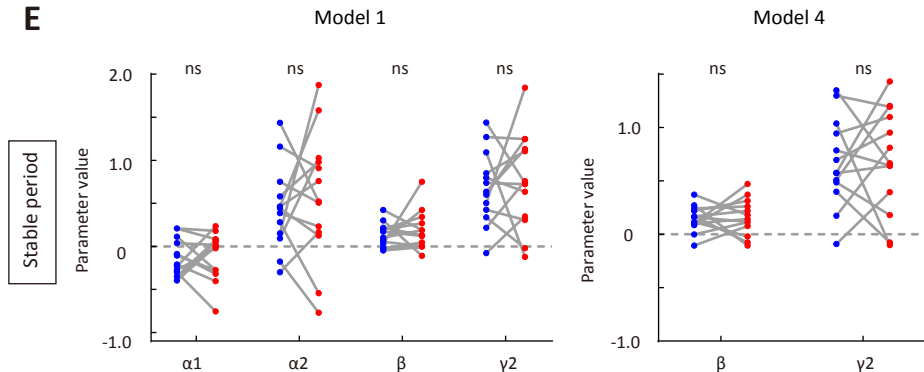

**F**

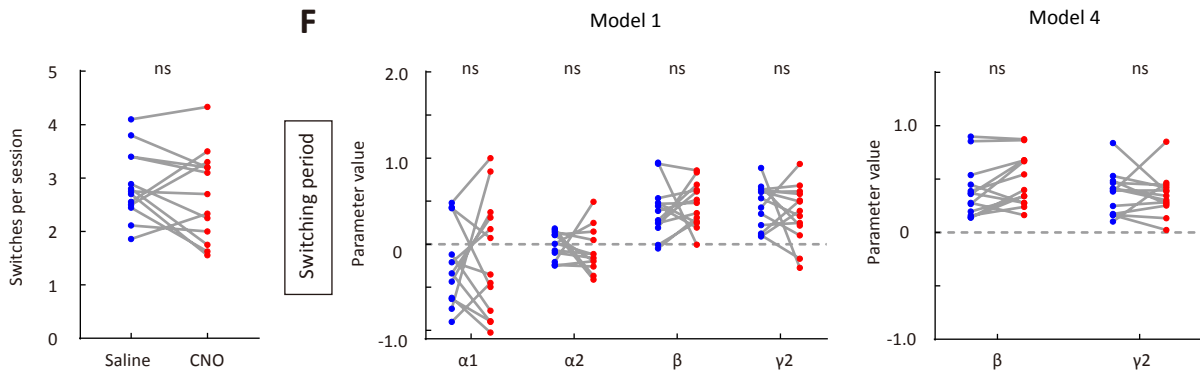

Supplement: supp [file elife_poa_e54474_Figure_4_figure_supplement_6.pdf › elife_poa_e54474_Figure_4_figure_supplement_6.pdf]

**A**

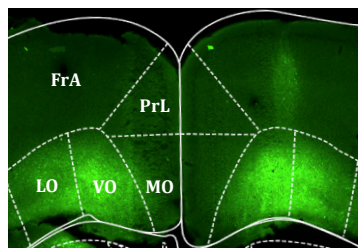

## B

Switching period

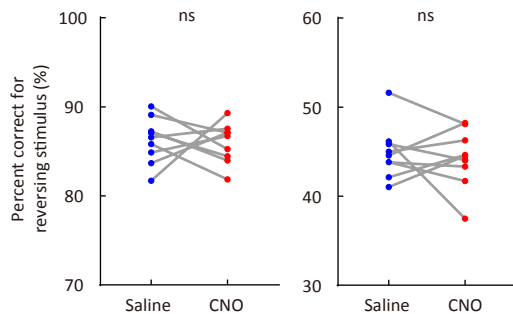

**C**

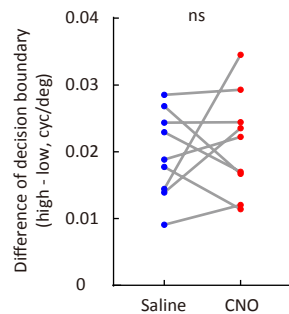

D

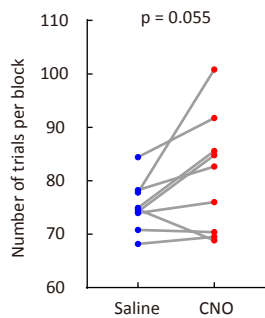

# E

Model 4

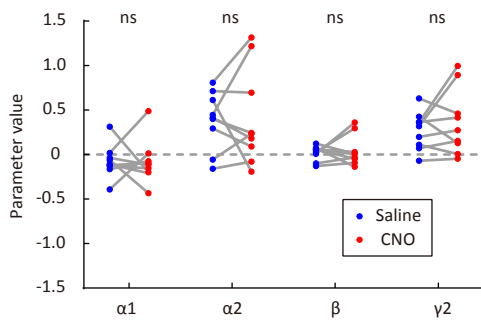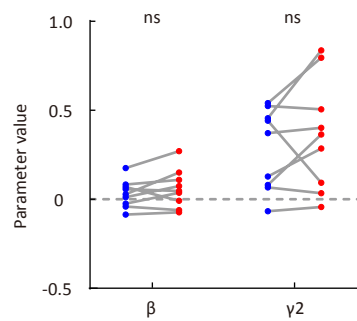**F**

Model 4

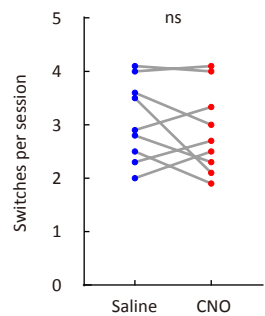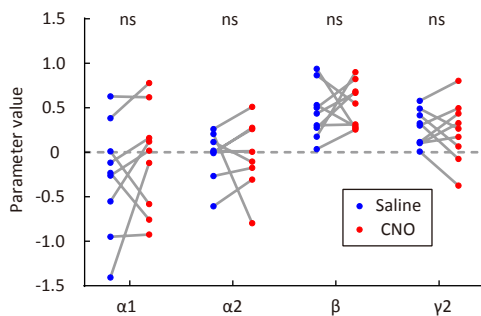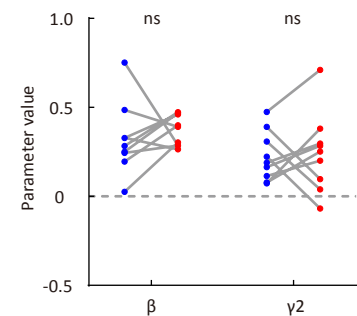

Supplement: supp [file elife_poa_e54474_Figure_4_figure_supplement_7.pdf › elife_poa_e54474_Figure_4_figure_supplement_7.pdf]

Figure 5 - figure supplement 1

A

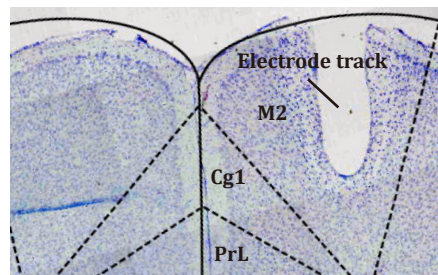

B

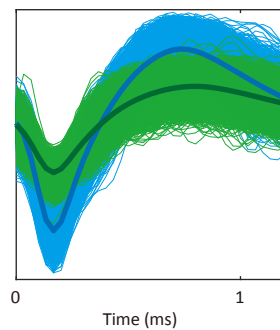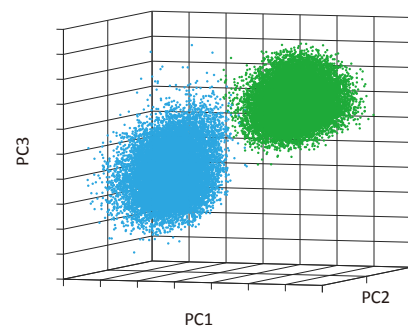

C

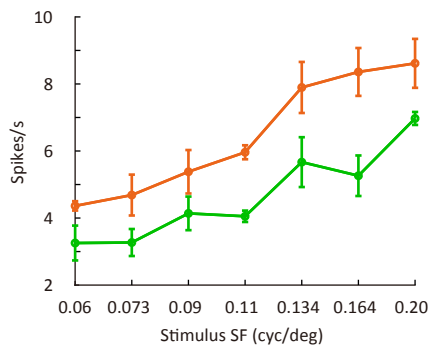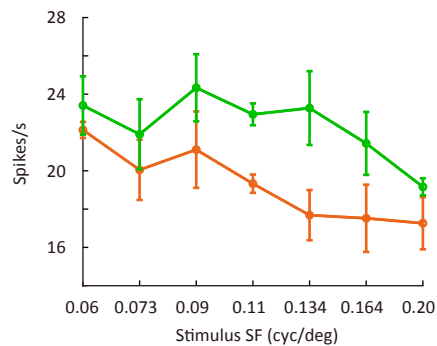

Supplement: supp [file elife_poa_e54474_Figure_5_figure_supplement_1.pdf › elife_poa_e54474_Figure_5_figure_supplement_1.pdf]

**Figure 5 - figure supplement 2**

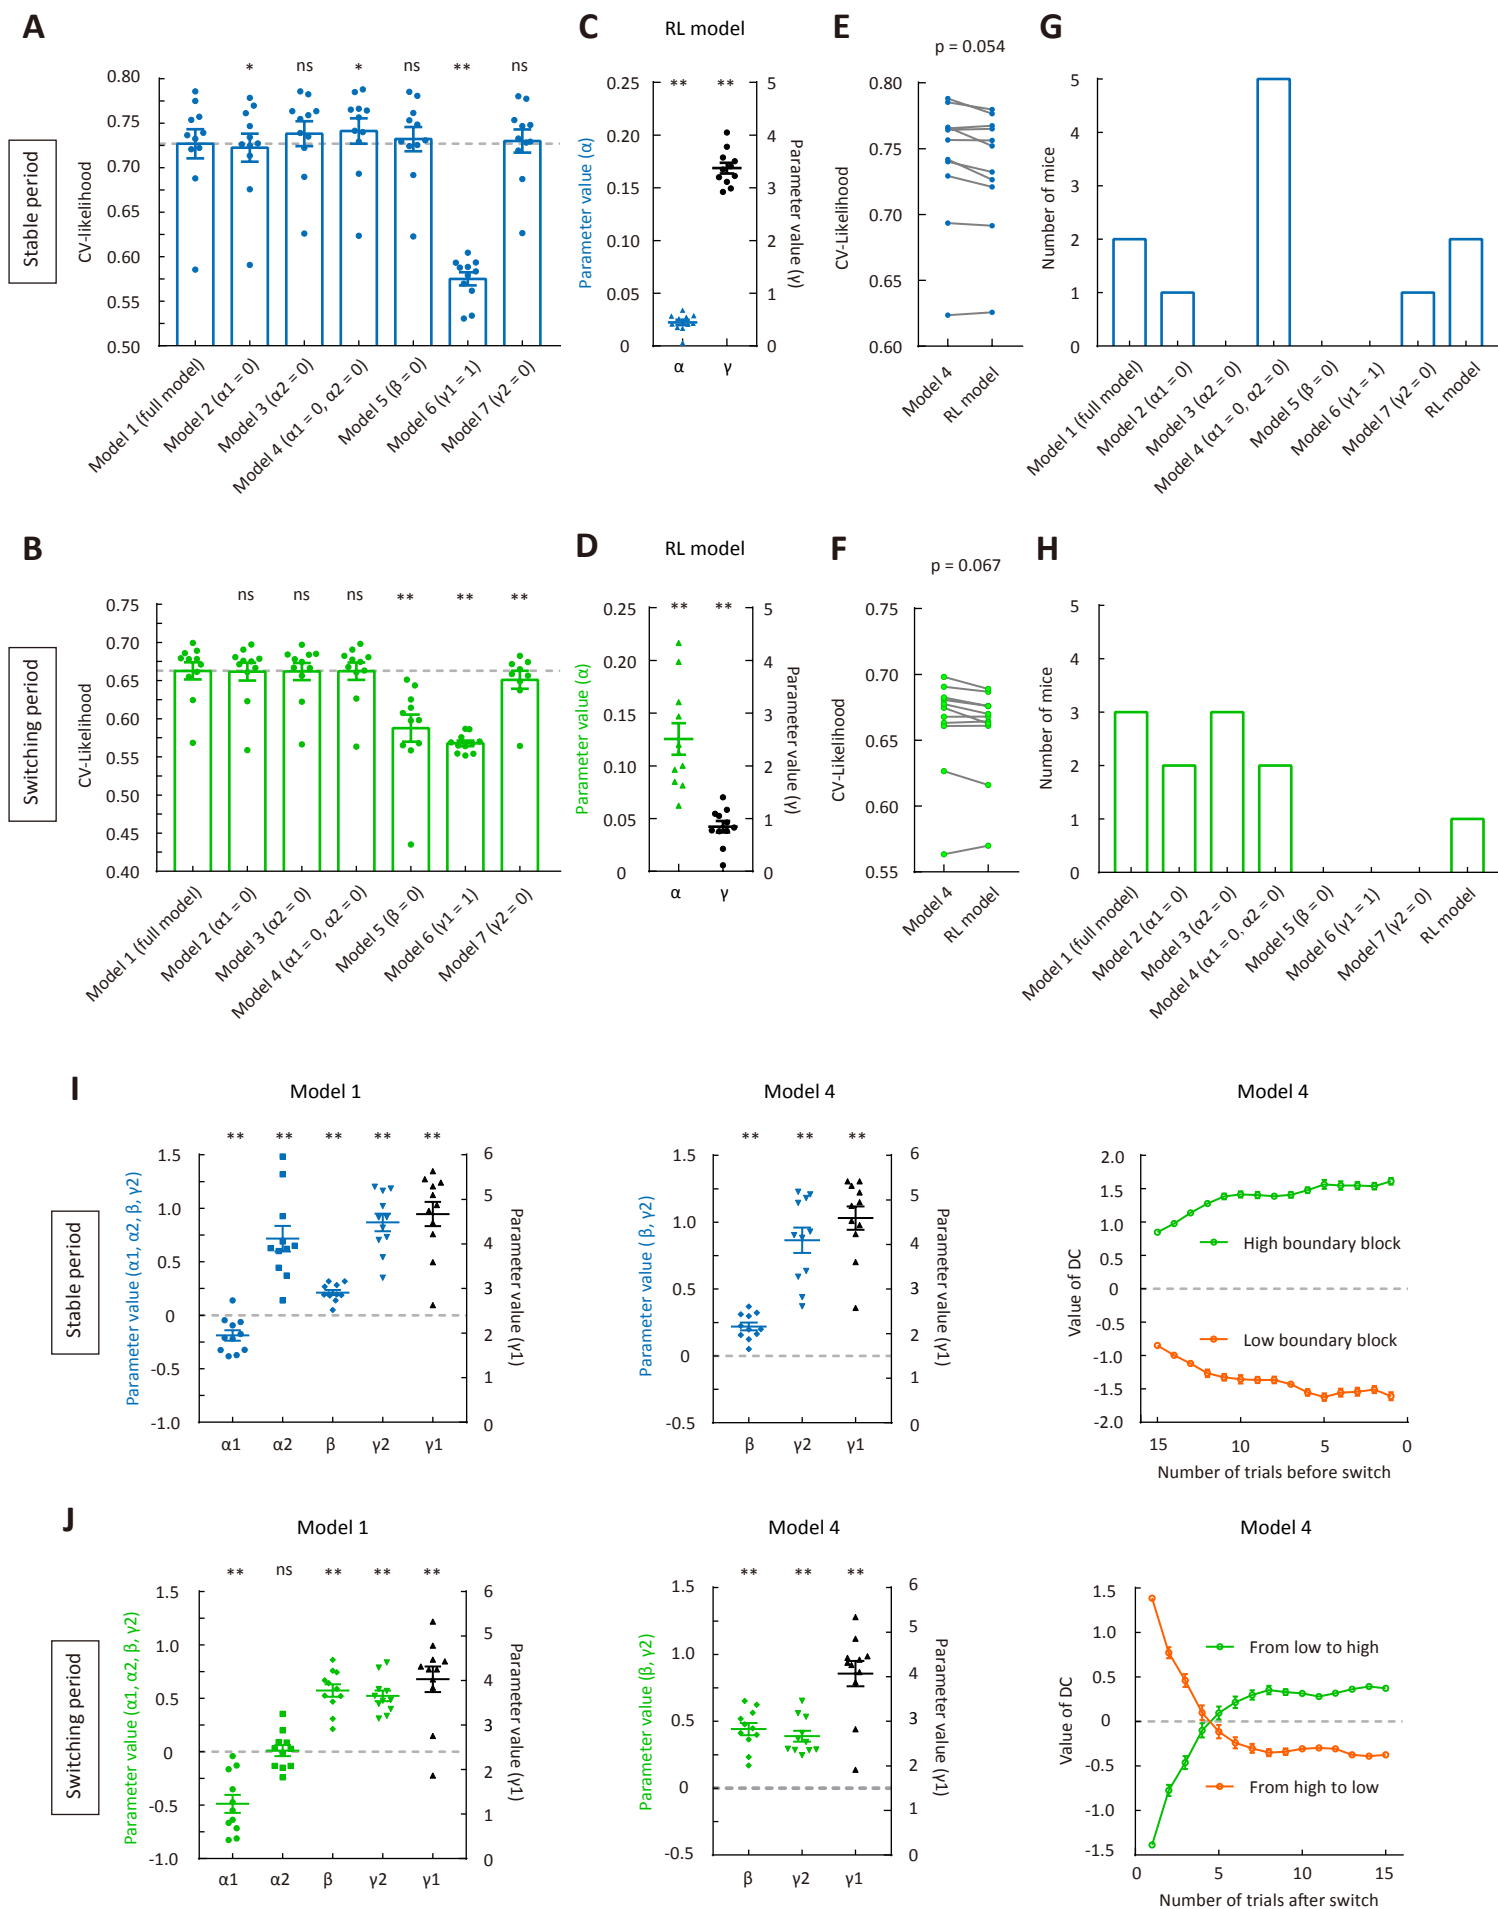

Supplement: supp [file elife_poa_e54474_Figure_5_figure_supplement_2.pdf › elife_poa_e54474_Figure_5_figure_supplement_2.pdf]

**Figure 5 - figure supplement 3**

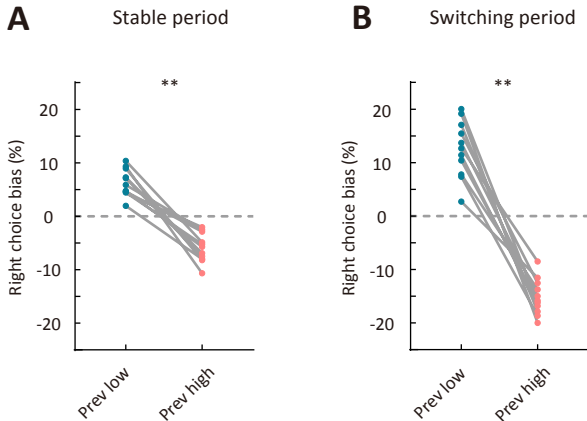

Supplement: supp [file elife_poa_e54474_Figure_5_figure_supplement_3.pdf › elife_poa_e54474_Figure_5_figure_supplement_3.pdf]

**Figure 5 - figure supplement 4**

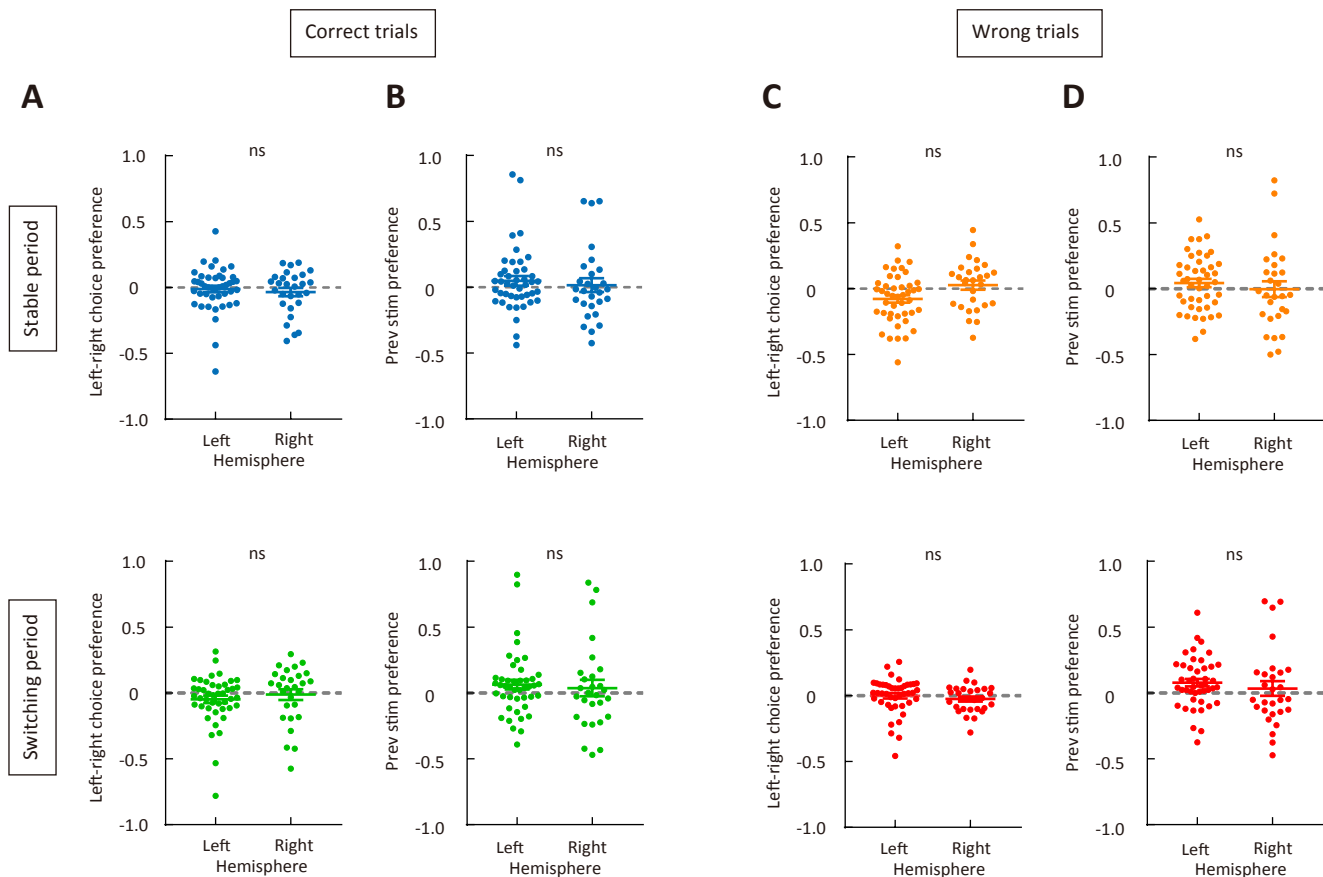

Supplement: supp [file elife_poa_e54474_Figure_5_figure_supplement_4.pdf › elife_poa_e54474_Figure_5_figure_supplement_4.pdf]

**Figure 5 - figure supplement 5**

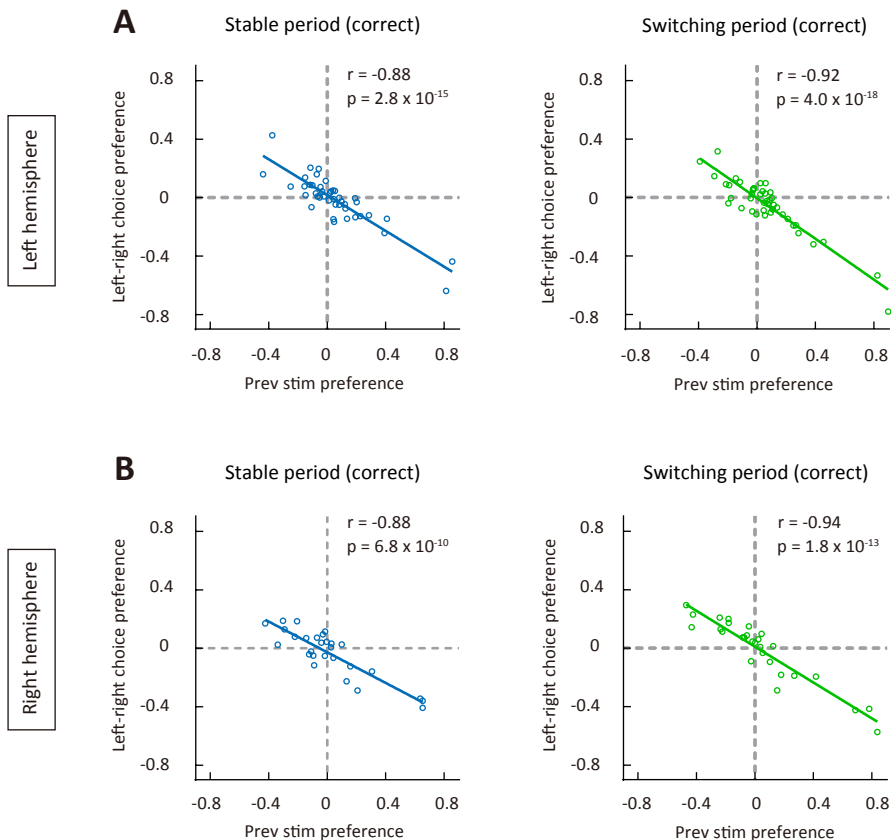

Supplement: supp [file elife_poa_e54474_Figure_5_figure_supplement_5.pdf › elife_poa_e54474_Figure_5_figure_supplement_5.pdf]

**Figure 5 - figure supplement 7**

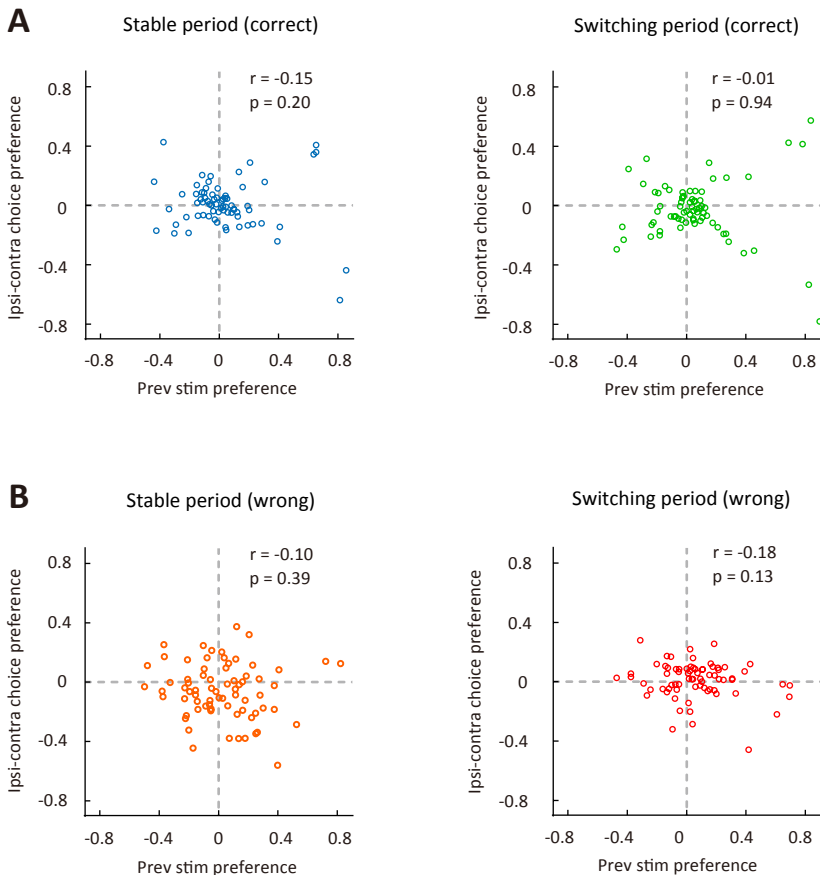

Supplement: supp [file elife_poa_e54474_Figure_5_figure_supplement_7.pdf › elife_poa_e54474_Figure_5_figure_supplement_7.pdf]
